# Supplementary material
Source: PubMed Central journal article supplement (PMC2000487)
Supplement: pnas_0702872104_2.pdf [file pnas_0702872104_2.pdf]

A Multi-model average (ALL 20CEN, 1980-1999)

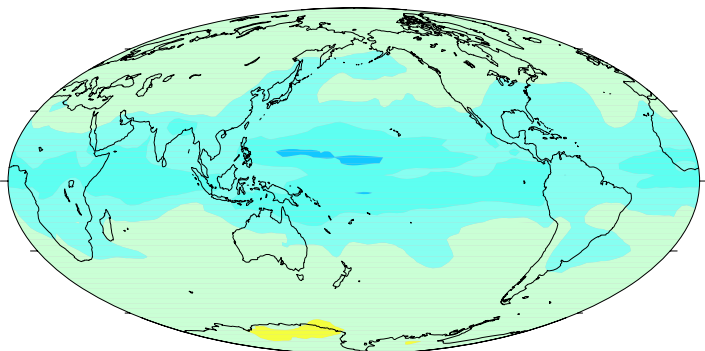

B S/N ratio (ALL 20CEN, 1980-1999)

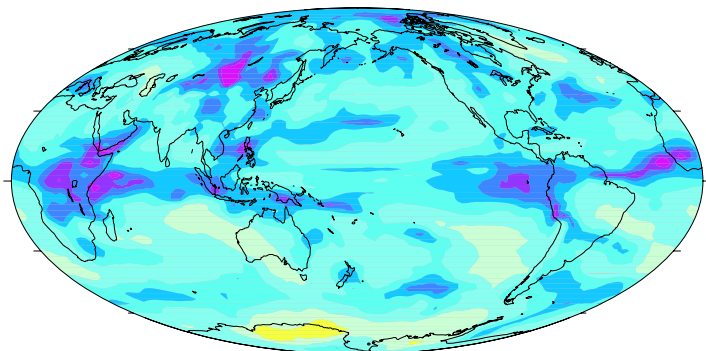

C Multi-model average (ALL 20CEN, 1900-1999)

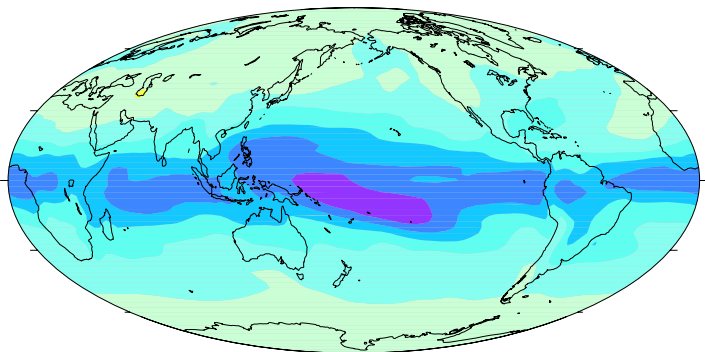

D S/N ratio (ALL 20CEN, 1900-1999)

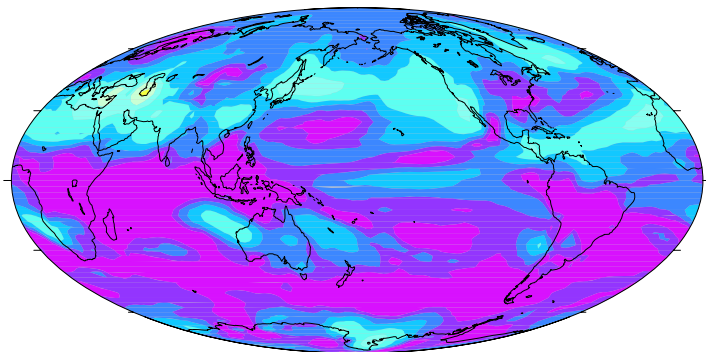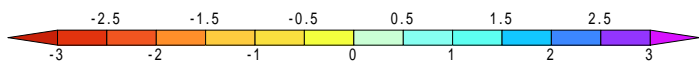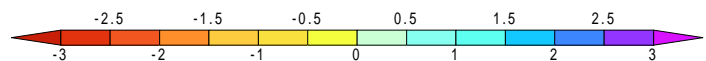

Total linear trend in water vapor ( $\text{kg/m}^2$ )

Signal-to-noise ratio (dimensionless)
