# Supplementary material
Source: PubMed Central journal article supplement (PMC2000487)
Supplement: pnas_0702872104_3.pdf [file pnas_0702872104_3.pdf]

A ALL fingerprint (20CEN runs; raw)

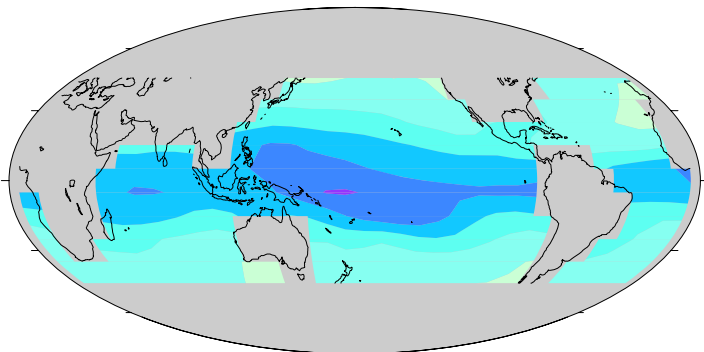

B ANTHRO fingerprint (20CEN runs; raw)

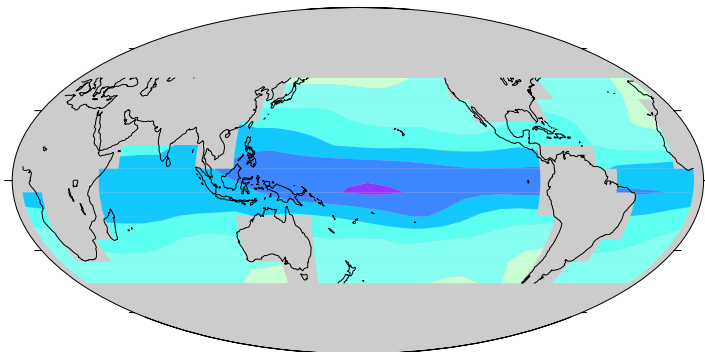

C ALL fingerprint (20CEN runs; rotated)

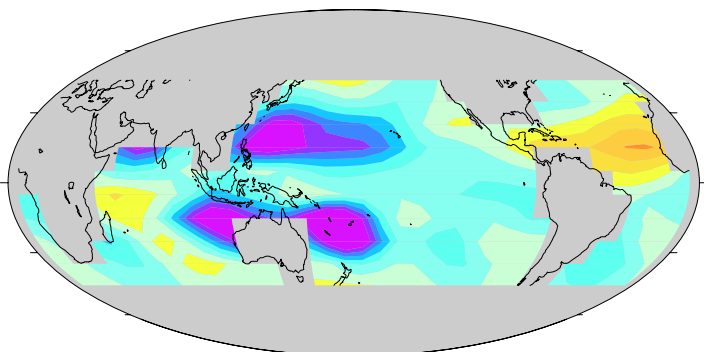

D ANTHRO fingerprint (20CEN runs; rotated)

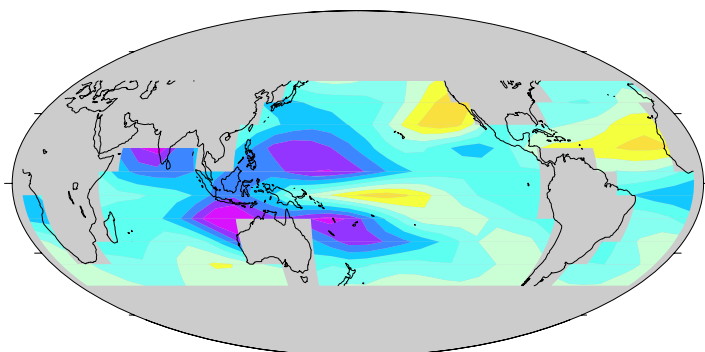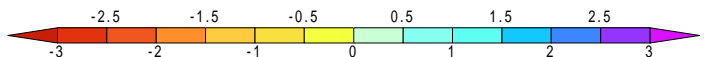

EOF loading

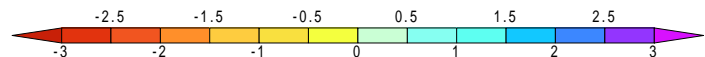

EOF loading
