# Supplementary material
Source: PubMed Central journal article supplement (PMC2000487)

# Precipitable Water Changes in MIROC3.2 T42 GHG and VLCN Runs

Spatial average over oceans (50°N-50°S). Anomalies w.r.t. 1988-2000 climatological means

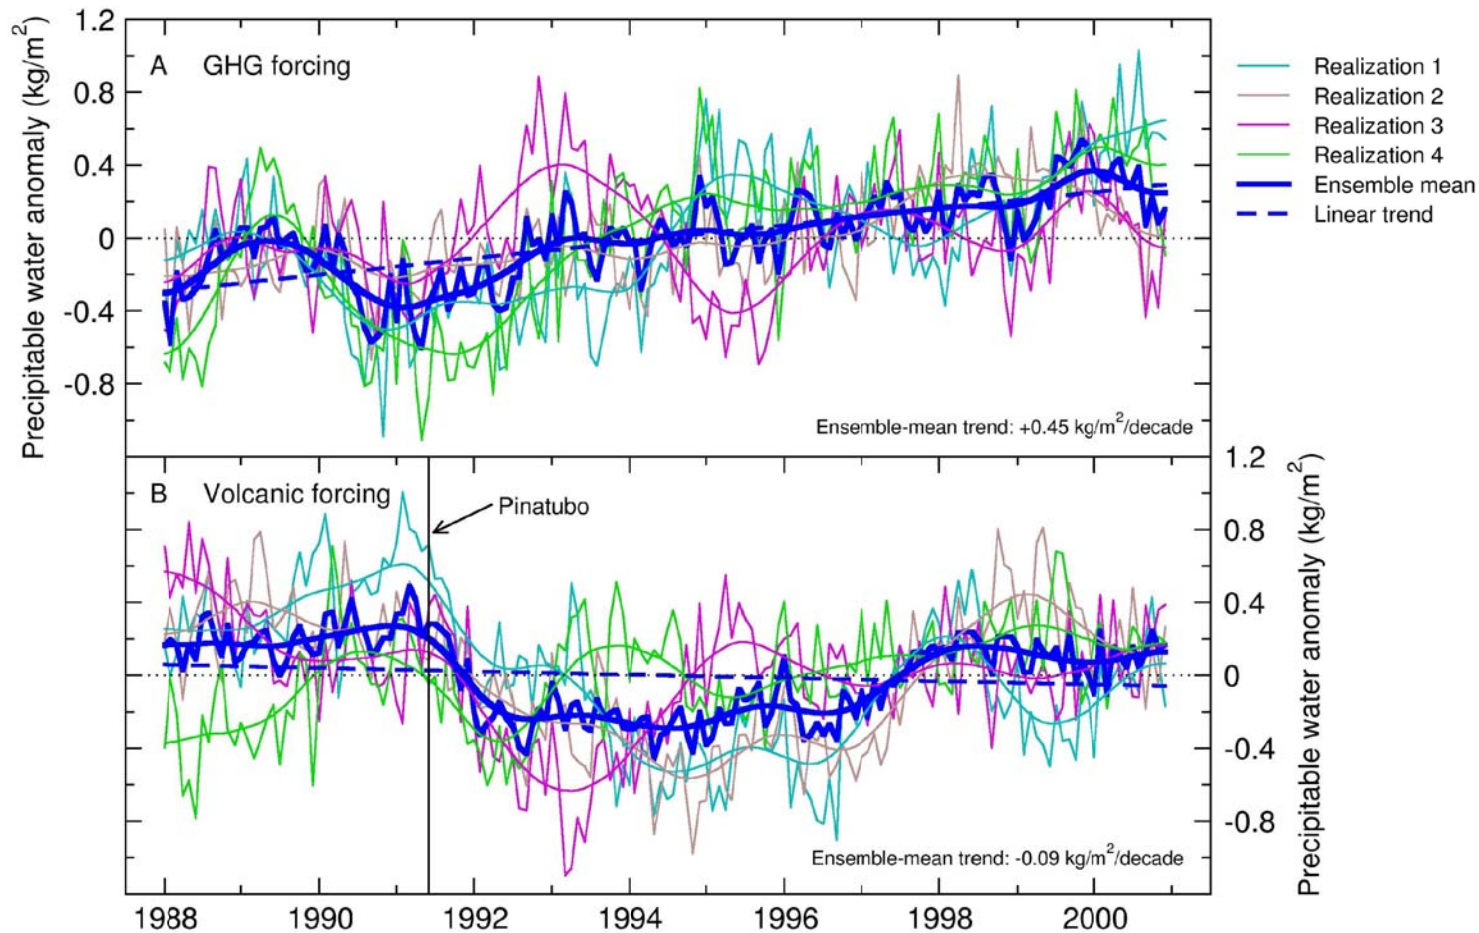

Supplement: pnas_0702872104_6.pdf [file pnas_0702872104_6.pdf]
