# Supplementary material
Source: PubMed Central journal article supplement (PMC2000487)

Projection of ALL Model Noise onto Unrotated ALL Model Fingerprint  
4,440 years. Variable:  $W_o$ . Domain: 50°N-50°S. Annual mean anomalies

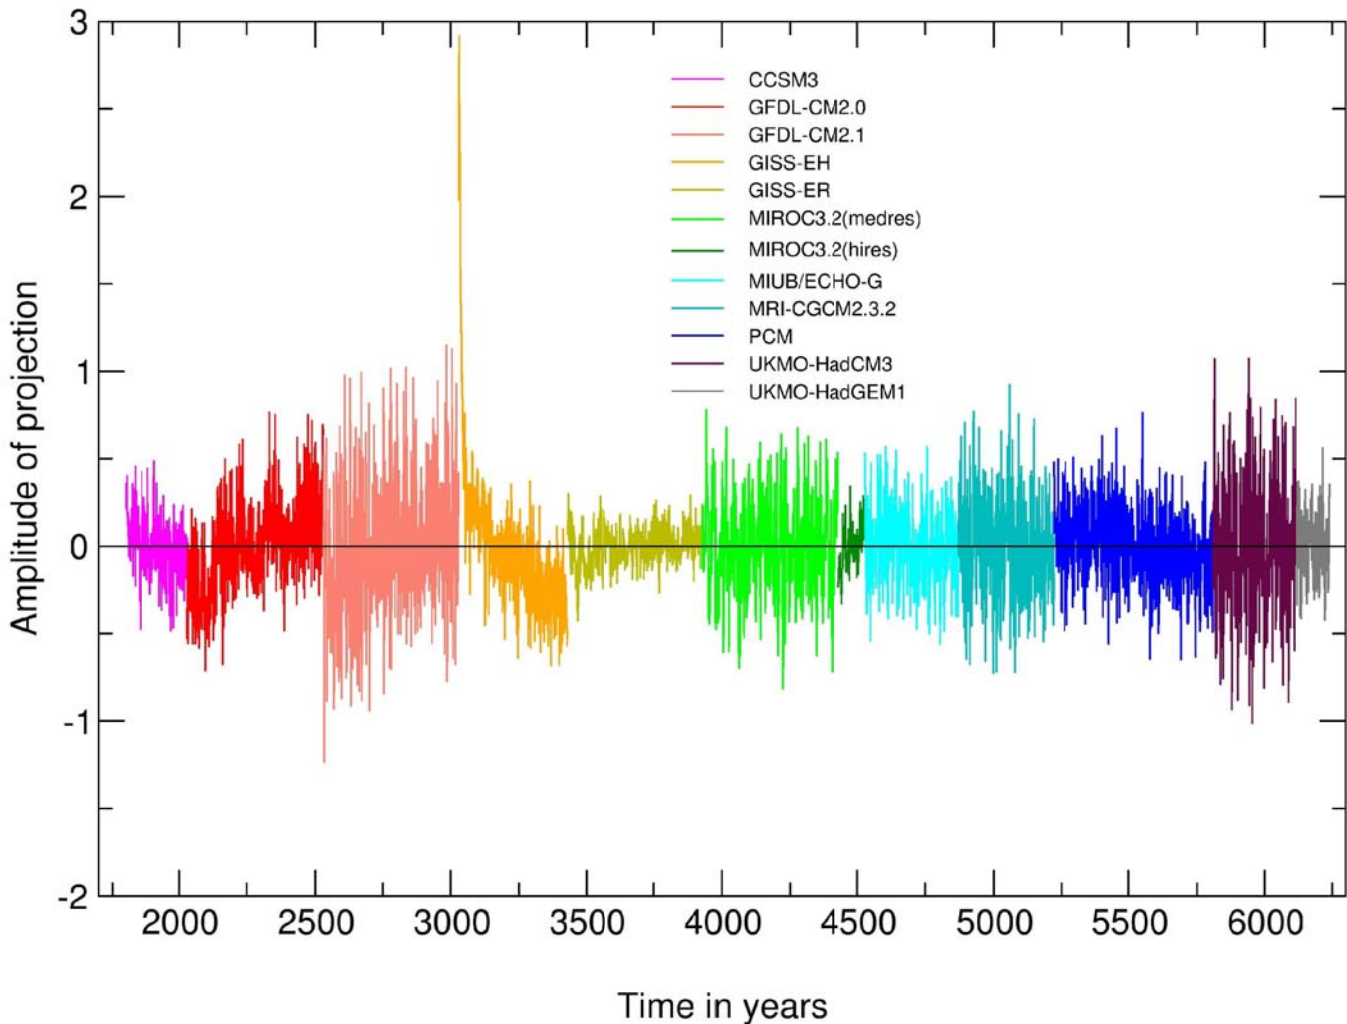

Supplement: pnas_0702872104_7.pdf [file pnas_0702872104_7.pdf]
