# Supplementary material
Source: PubMed Central journal article supplement (PMC2000487)
Supplement: pnas_0702872104_10.pdf [file pnas_0702872104_10.pdf]

**Table 2. Forcings used in IPCC simulations of 20th century climate change**

|    | Model              | G | O | SD | SI | BC | OC | MD | SS | LU | SO | VL |
|----|--------------------|---|---|----|----|----|----|----|----|----|----|----|
| 1  | CCSM3              | Y | Y | Y  | -  | Y  | Y  | -  | -  | -  | Y  | Y  |
| 2  | GFDL-CM2.0         | Y | Y | Y  | -  | Y  | Y  | -  | -  | Y  | Y  | Y  |
| 3  | GFDL-CM2.1         | Y | Y | Y  | -  | Y  | Y  | -  | -  | Y  | Y  | Y  |
| 4  | GISS-EH            | Y | Y | Y  | Y  | Y  | Y  | Y  | Y  | Y  | Y  | Y  |
| 5  | GISS-ER            | Y | Y | Y  | Y  | Y  | Y  | Y  | Y  | Y  | Y  | Y  |
| 6  | MIROC3.2(medres)   | Y | Y | Y  | Y  | Y  | Y  | Y  | Y  | Y  | Y  | Y  |
| 7  | MIROC3.2(hires)    | Y | Y | Y  | Y  | Y  | Y  | Y  | Y  | Y  | Y  | Y  |
| 8  | MIUB/ECHO-G        | Y | - | Y  | Y  | -  | -  | -  | -  | -  | Y  | Y  |
| 9  | MRI-CGCM2.3.2      | Y | - | Y  | -  | -  | -  | -  | -  | -  | Y  | Y  |
| 10 | PCM                | Y | Y | Y  | -  | -  | -  | -  | -  | -  | Y  | Y  |
| 11 | UKMO-HadCM3        | Y | Y | Y  | Y  | -  | -  | -  | -  | -  | Y  | Y  |
| 12 | UKMO-HadGEM1       | Y | Y | Y  | Y  | Y  | Y  | -  | -  | Y  | Y  | Y  |
| 1  | BCCR-BCM2.0        | Y | - | Y  | -  | -  | -  | -  | -  | -  | -  | -  |
| 2  | CCCma-CGCM3.1(T47) | Y | - | Y  | -  | -  | -  | -  | -  | -  | -  | -  |
| 3  | CCCma-CGCM3.1(T63) | Y | - | Y  | -  | -  | -  | -  | -  | -  | -  | -  |
| 4  | CNRM-CM3           | Y | Y | Y  | -  | Y  | -  | -  | -  | -  | -  | -  |
| 5  | CSIRO-Mk3.0        | Y | - | Y  | -  | ?  | ?  | ?  | ?  | ?  | ?  | -  |
| 6  | ECHAM5/MPI-OM      | Y | Y | Y  | Y  | -  | -  | -  | -  | -  | -  | -  |
| 7  | FGOALS-g1.0        | Y | - | Y  | ?  | -  | -  | -  | -  | -  | -  | -  |
| 8  | GISS-AOM           | Y | - | Y  | -  | -  | -  | -  | Y  | -  | -  | -  |
| 9  | INM-CM3.0          | Y | - | Y  | -  | -  | -  | -  | -  | -  | Y  | -  |
| 10 | IPSL-CM4           | Y | - | Y  | Y  | -  | -  | -  | -  | -  | -  | -  |

Results are partitioned into ALL and ANTHRO models (first 12 rows and last 10 rows, respectively). Y, inclusion of a specific forcing; ?, case where there is uncertainty regarding inclusion of the forcing; G, well mixed GHGs; O, tropospheric and stratospheric ozone; SD, sulfate aerosol direct effects; SI, sulfate aerosol indirect effects; BC, black carbon; OC, organic carbon; MD, mineral dust; SS, sea salt; LU, land use change; SO, solar irradiance; VL, volcanic aerosols.
