# Supplementary material
Source: PubMed Central journal article supplement (PMC2000487)
Supplement: pnas_0702872104_11.pdf [file pnas_0702872104_11.pdf]

**Table 3. Technical details of IPCC 20CEN runs and preindustrial control integrations**

|    | Model              | AGCM resolution | $N_r$ | CTL <sub>1</sub> | CTL <sub><math>N</math></sub> | $L$  | $N_c$ |
|----|--------------------|-----------------|-------|------------------|-------------------------------|------|-------|
| 1  | CCSM3              | T85             | 8     | 280              | 509                           | 230  | 12    |
| 2  | GFDL-CM2.0         | 2.0° × 2.5°     | 3     | 1                | 500                           | 500  | 26    |
| 3  | GFDL-CM2.1         | 2.0° × 2.5°     | 3     | 1                | 500                           | 500  | 26    |
| 4  | GISS-EH            | 4.0° × 5.0°     | 5     | 1880             | 2279                          | 400  | 21    |
| 5  | GISS-ER            | 4.0° × 5.0°     | 9     | 1901             | 2400                          | 500  | 26    |
| 6  | MIROC3.2(medres)   | T42             | 3     | 2300             | 2799                          | 500  | 26    |
| 7  | MIROC3.2(hires)    | T106            | 1     | 1                | 100                           | 100  | 5     |
| 8  | MIUB/ECHO-G        | T30             | 5     | 1860             | 2200                          | 341  | 17    |
| 9  | MRI-CGCM2.3.2      | T42             | 5     | 1851             | 2200                          | 350  | 18    |
| 10 | PCM                | T42             | 4     | 451              | 1079                          | 589  | 31    |
| 11 | UKMO-HadCM3        | 2.5° × 3.75°    | 1     | 1850             | 2159                          | 310  | 16    |
| 12 | UKMO-HadGEM1       | 1.25° × 1.875°  | 2     | 2139             | 2259                          | 120  | 6     |
| 1  | BCCR-BCM2.0        | T63             | 1     | 1850             | 2099                          | 250  | 13    |
| 2  | CCCma-CGCM3.1(T47) | T47             | 5     | 1850             | 2850                          | 1001 | 52    |
| 3  | CCCma-CGCM3.1(T63) | T63             | 1     | 1850             | 2199                          | 350  | 18    |
| 4  | CNRM-CM3           | T63             | 1     | 1930             | 2429                          | 500  | 26    |
| 5  | CSIRO-Mk3.0        | T63             | 3     | 1871             | 2250                          | 380  | 20    |
| 6  | ECHAM5/MPI-OM      | T63             | 4     | 2150             | 2655                          | 506  | 26    |
| 7  | FGOALS-g1.0        | T42             | 3     | 1850             | 2199                          | 350  | 18    |
| 8  | GISS-AOM           | 3.0° × 4.0°     | 2     | 1850             | 2100                          | 251  | 13    |
| 9  | INM-CM3.0          | 4.0° × 5.0°     | 1     | 1871             | 2200                          | 330  | 17    |
| 10 | IPSL-CM4           | 2.5° × 3.75°    | 1     | 1860             | 2359                          | 500  | 26    |
|    | Total              | -               | 71    | -                | -                             | 8848 | 459   |

The Atmospheric General Circulation Model (AGCM) resolution is given for both spectral models (in terms of the triangular truncation; e.g., T30, T42, etc.) and gridpoint models (in terms of the latitude/longitude spacing of gridpoints).  $N_r$  is the number of realizations that were used for calculating 20CEN ensemble means; CTL<sub>1</sub>, CTL <sub>$N$</sub> , and  $L$  are (respectively) the first year, last year, and length (in years) of the preindustrial control runs employed for estimating the sampling distributions of unforced SST trends shown in Fig. 2;  $N_c$  is the number of nonoverlapping 19-yr linear trends estimated from each control run. Note that the start date of each control run is arbitrary.
