# Supplementary material
Source: PubMed Central journal article supplement (PMC2000487)

# Projection of ANTHRO Model Noise onto Unrotated ALL Model Fingerprint

4,418 years. Variable:  $W_o$ . Domain: 50°N-50°S. Annual mean anomalies

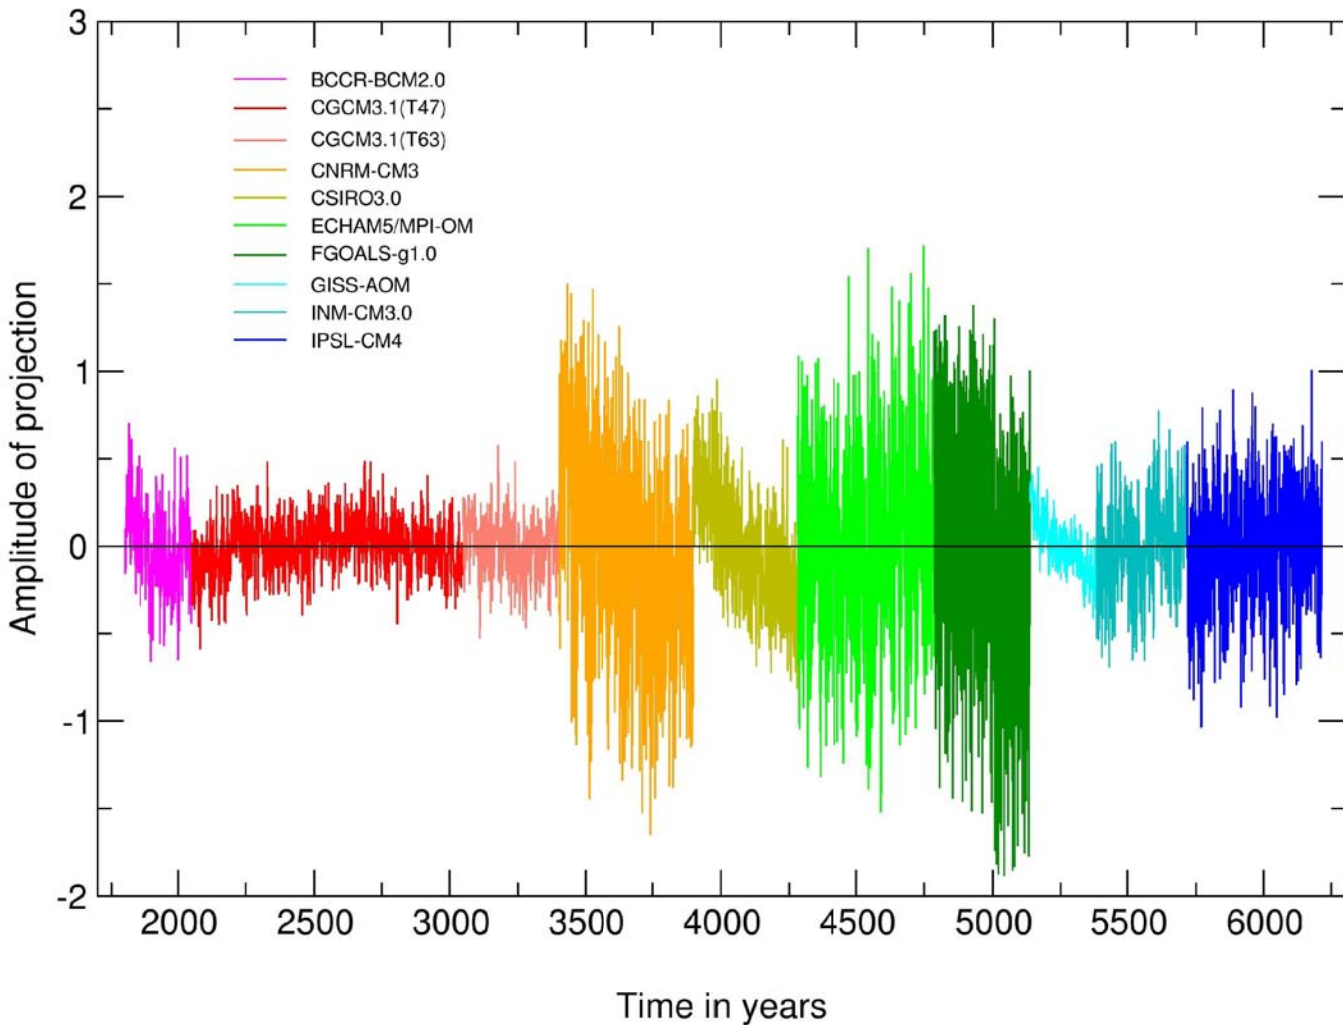

Supplement: pnas_0702872104_13.pdf [file pnas_0702872104_13.pdf]
