# Supplementary material
Source: PubMed Central journal article supplement (PMC2000487)

# Estimation of Detection Time

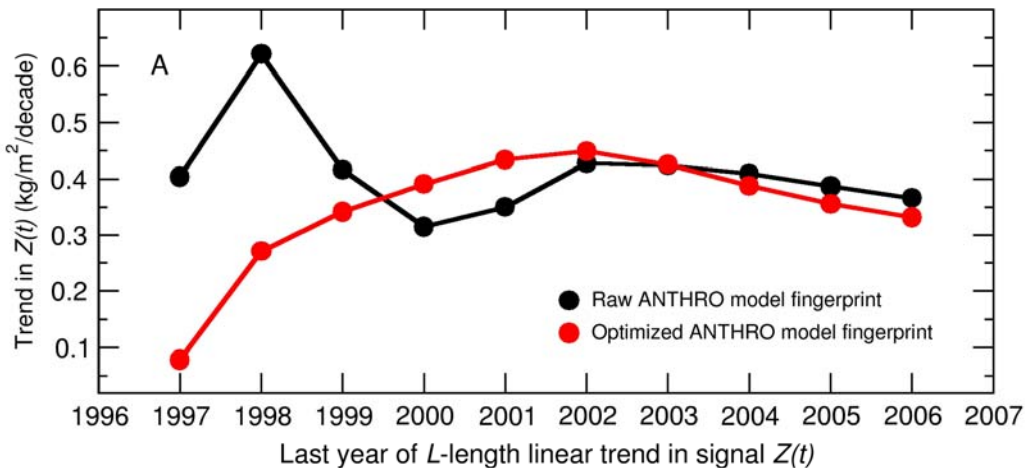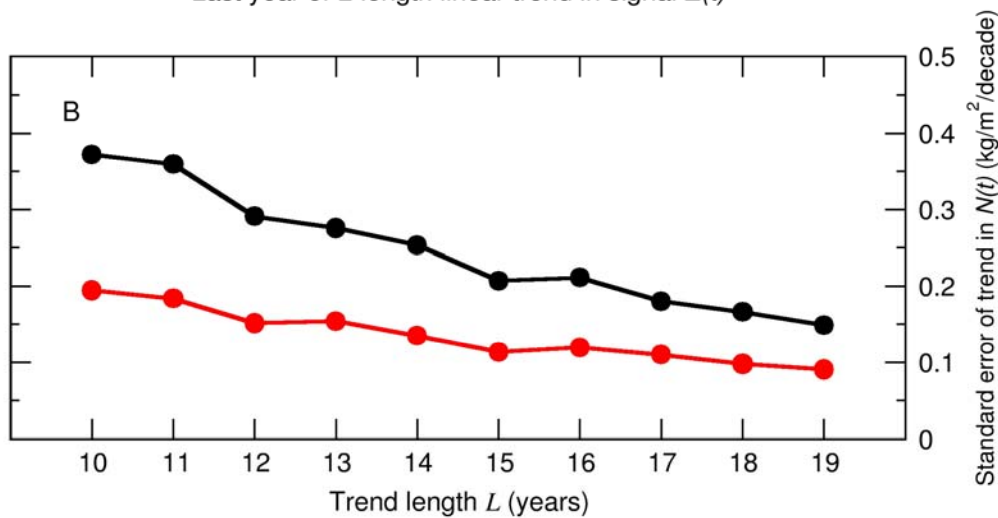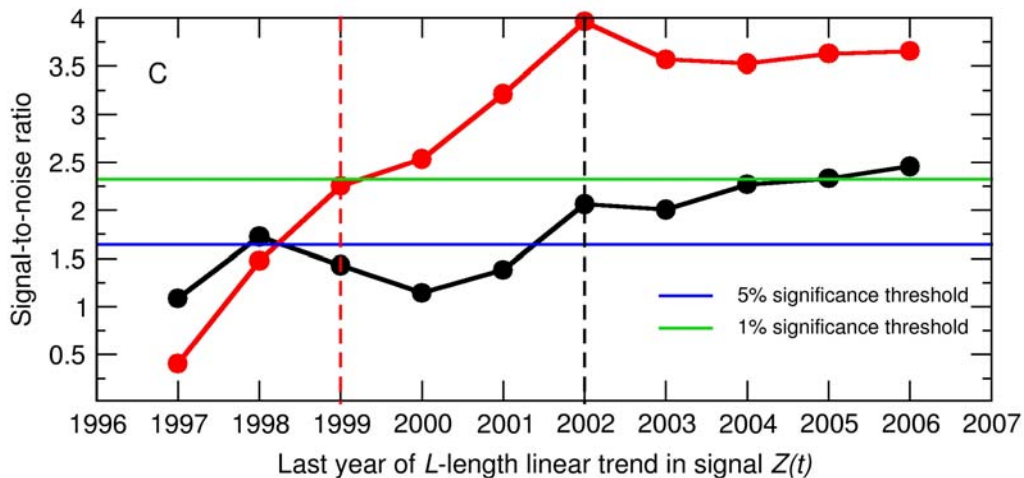

Supplement: pnas_0702872104_4.pdf [file pnas_0702872104_4.pdf]

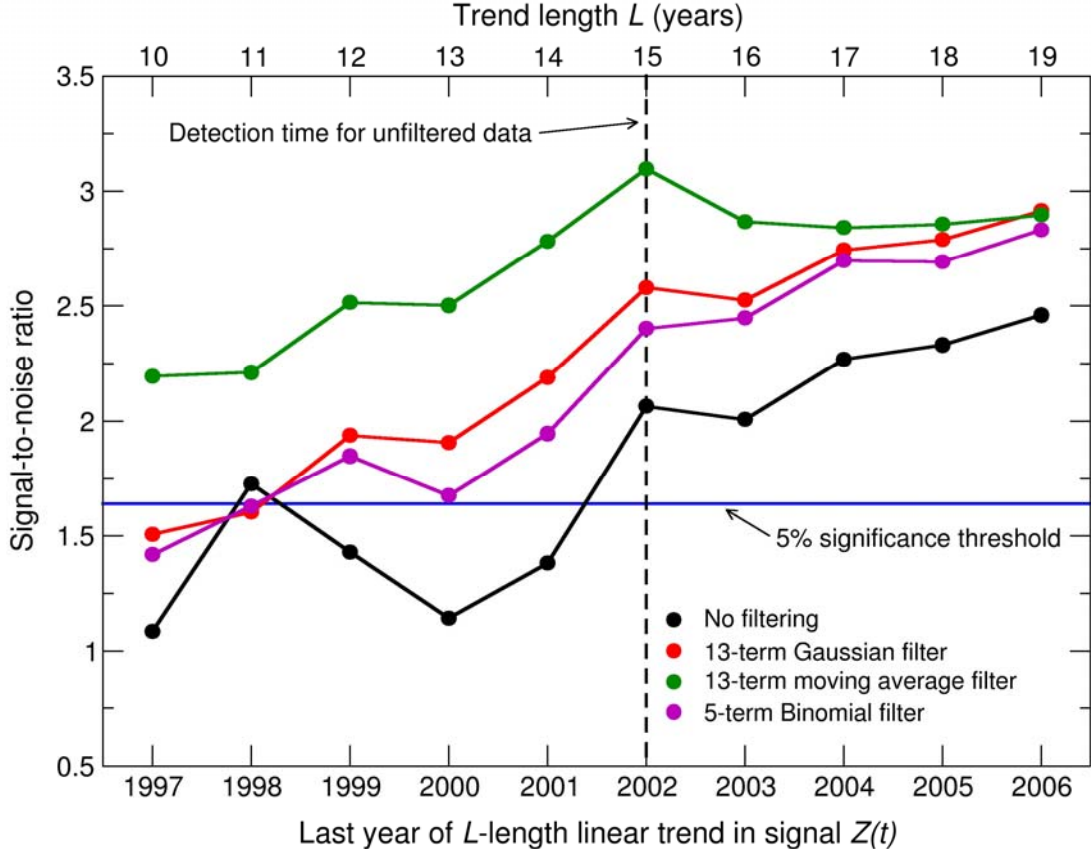

Supplement: pnas_0702872104_5.pdf [file pnas_0702872104_5.pdf]

# Response Function for Lynch/Huang Digital Filter

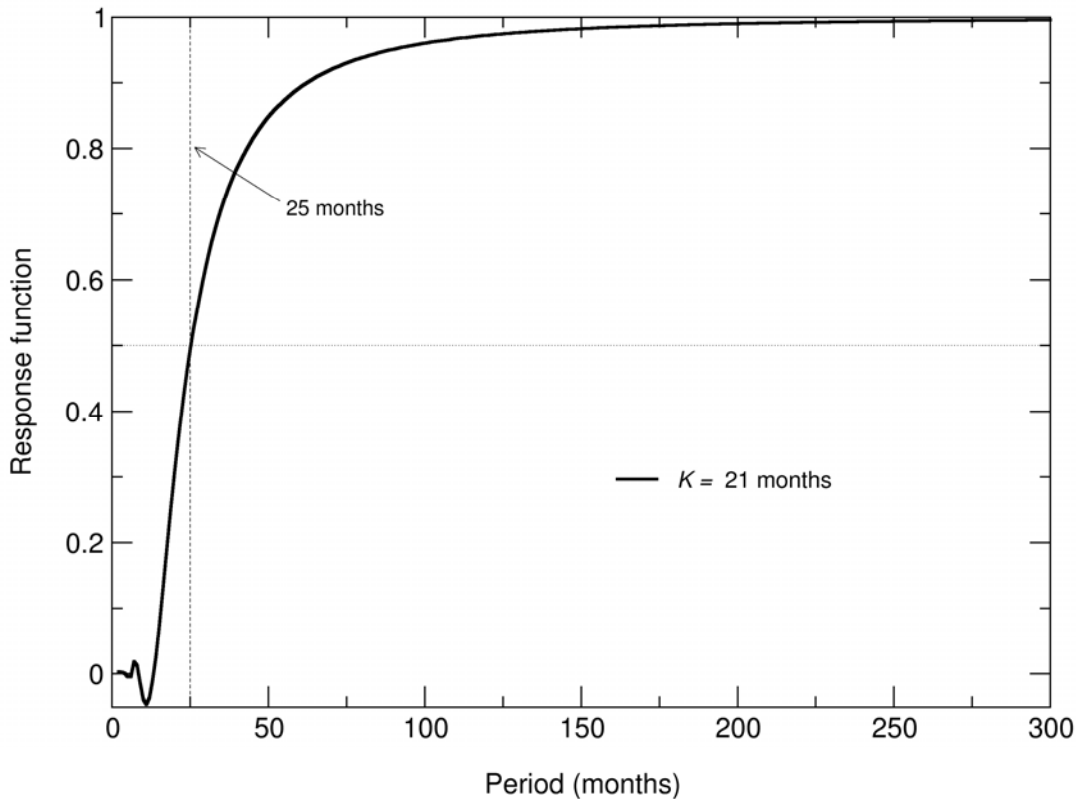

Supplement: pnas_0702872104_9.pdf [file pnas_0702872104_9.pdf]
